# Supplementary material for: Dynamic, conjugated microporous polymers: visible light harvesting via guest-responsive reversible swelling
Source: Royal Society of Chemistry journal article supplement (doi:10.1039/c5cp05052a), 2015-11-12
Supplement: c5cp05052a1.pdf [file c5cp05052a1.pdf]

## Supporting Information

### **Dynamic Conjugated Microporous Polymers: Visible Light-Harvesting via Guest Responsive Reversible Swelling**

K. Venkata Rao,<sup>a</sup> Ritesh Haldar,<sup>a</sup> Tapas Kumar Maji,<sup>a,b\*</sup> and Subi J. George<sup>a\*</sup>

<sup>a</sup>Supramolecular Chemistry Laboratory, New Chemistry Unit, <sup>b</sup>Chemistry and Physics of Materials Unit, Jawaharlal Nehru Centre for Advanced Scientific Research (JNCASR), Jakkur P.O, Bangalore 560064, India.

#### Supporting figures:

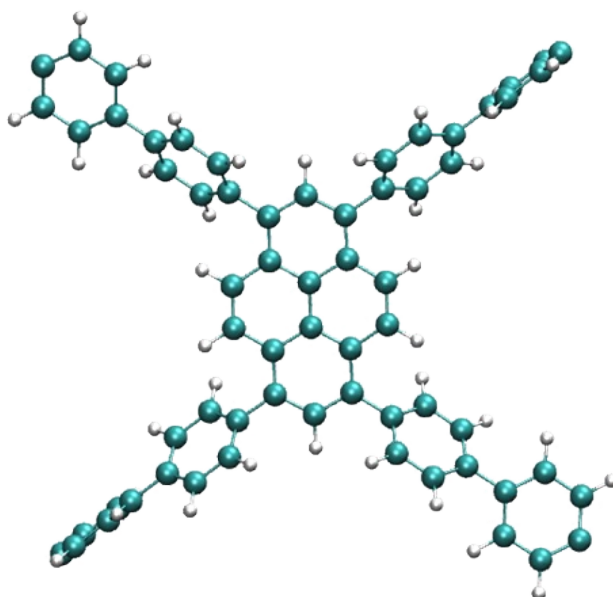

**Figure S1.** Energy minimized geometry of tetra biphenyl pyrene.

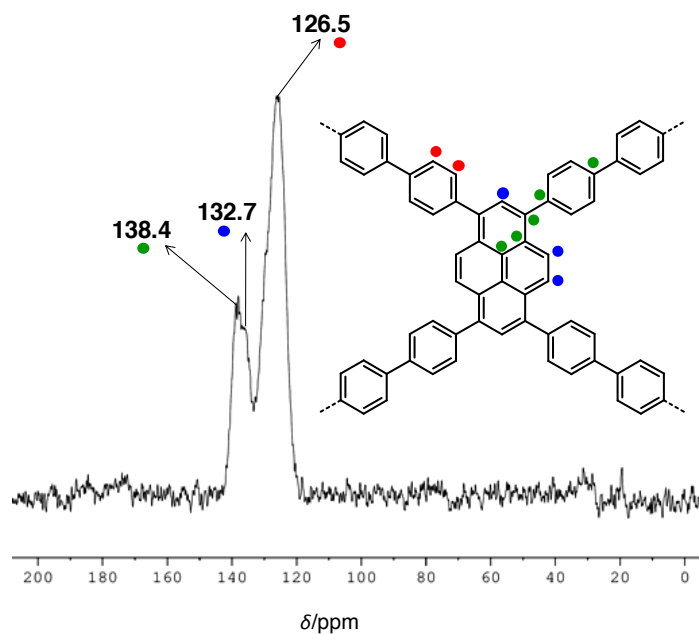

**Figure S2.** Solid-state  $^{13}\text{C}$ -CP-TOSS NMR spectrum of **Py-BPP**.

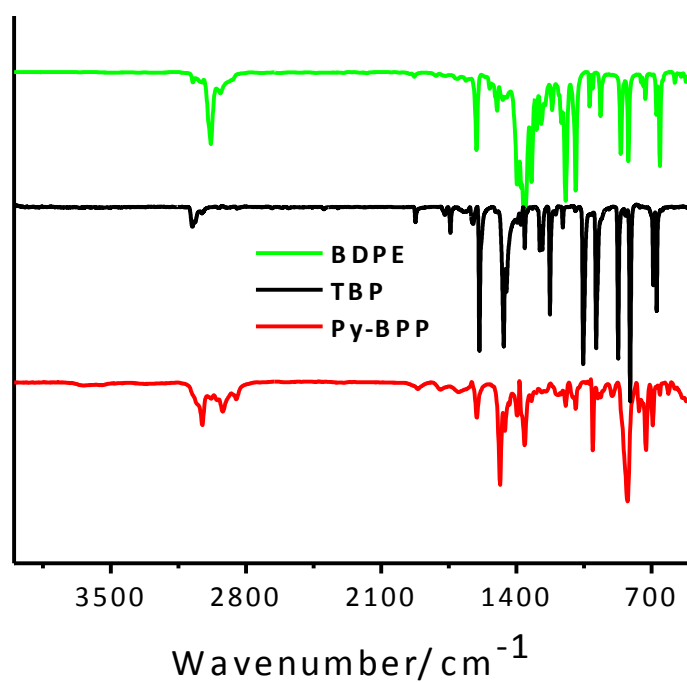

**Figure S3.** Solid-state FT-IR spectra of **BDPE**, **TBP** and **Py-BPP** measured in KBr.

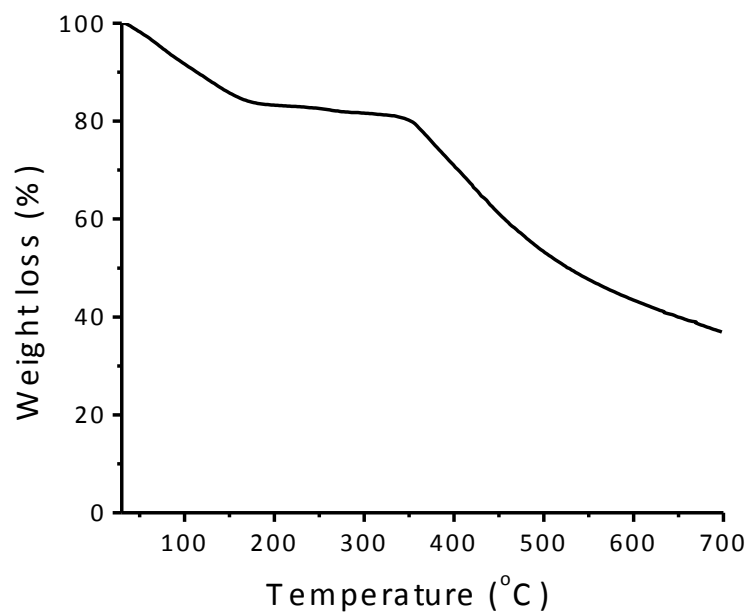

**Figure S4.** TGA profile of **Py-BPP** measured under N<sub>2</sub> atmosphere.

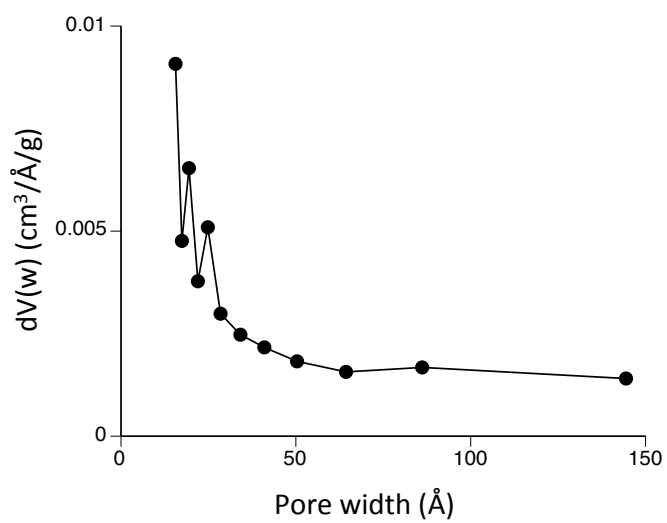

**Figure S5.** Pore size distributions of **Py-BPP** calculated by the NLDFIT method

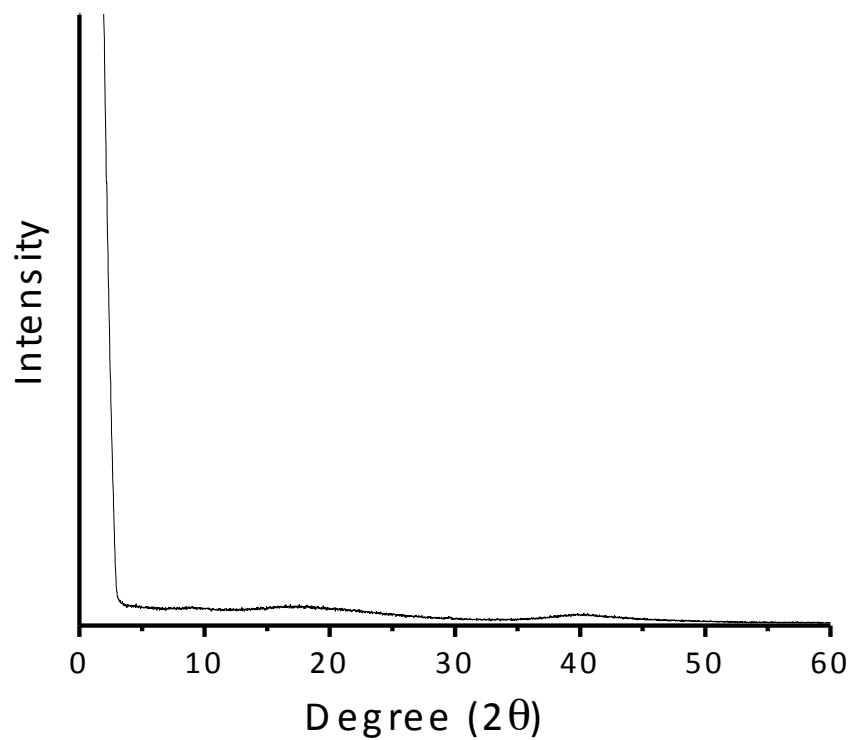

**Figure S6.** PXRD pattern of **Py-BPP**.

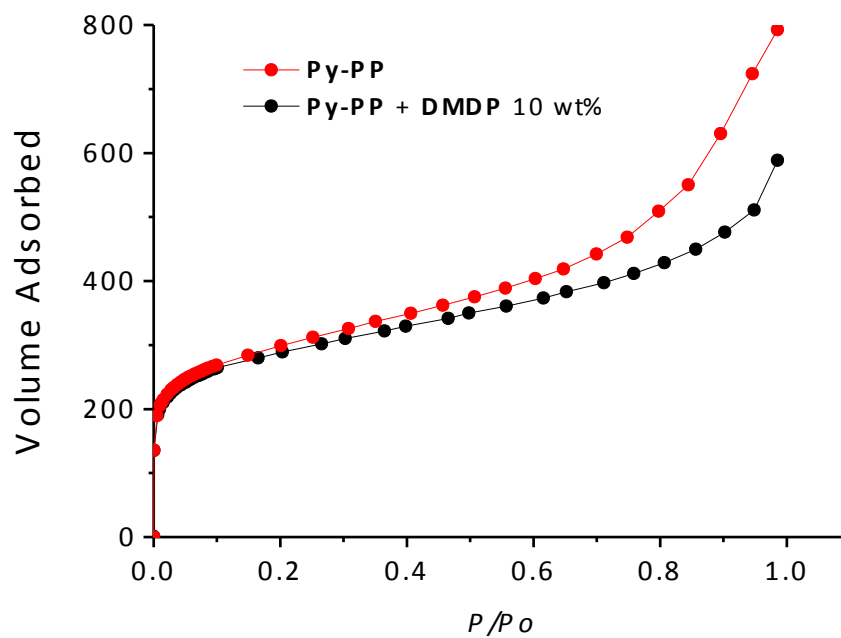

**Figure S7.** N<sub>2</sub> adsorption isotherms (77 K) of **Py-PP** before and after encapsulation of 10 wt% **DMDP** dye.

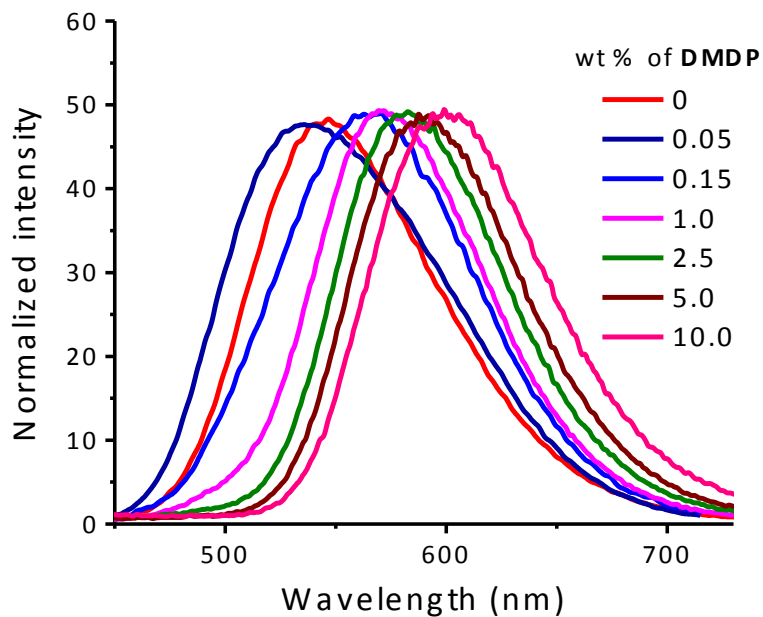

**Figure S8.** Normalized emission spectra **Py-PP** loaded with different wt% of **DMDP** ( $\lambda_{\text{exc}} = 380 \text{ nm}$ ).

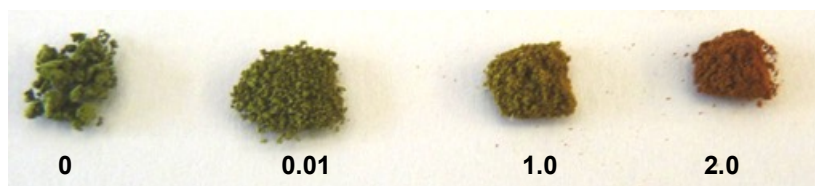

**Figure S9.** Photographs of **Py-BPP** powders loaded with different wt% of **DMDP** under ambient light.
